# Supplementary material for: Contrasting transcriptional responses of PYR1/PYL/RCAR ABA receptors to ABA or dehydration stress between maize seedling leaves and roots
Source: PubMed Central journal article supplement (PMC4839062; doi:10.1186/s12870-016-0764-x), 2016-04-21
Supplement: 12870_2016_764_MOESM2_ESM.pdf [file 12870_2016_764_MOESM2_ESM.pdf]

**Table S1** Primers designed for gene expression analyses by quantitative RT-PCR (qRT-PCR).

| <b>Gene</b> | <b>Forward Primer</b>     | <b>Reverse Primer</b>   | <b>Accession</b> |
|-------------|---------------------------|-------------------------|------------------|
| ZmPYL1      | GGAGAAACGCAGCAGCAA        | GTCCAGTCCAAATCCATCCAC   | NM_001174992.1   |
| ZmPYL2      | AGGGTCTTCGGCTTCTCCATC     | GGTGTCGTCCTCGGTGTTGC    | NM_001157214.1   |
| ZmPYL3      | GACATCGTCGTCAAGCTCAACCT   | GGCAATTTGCAGTAGCAACGG   | NM_001176567.1   |
| ZmPYL4      | GTTTGCACACAGAGTACAAATCA   | GCAGGAACACACACAGCACA    | NM_001143005.2   |
| ZmPYL5      | GCACCGGCTCCAGAATA         | CACGCAGTCACGCCTACA      | NM_001154788.1   |
| ZmPYL6      | CCATCGTCAAGTGCAACCT       | GGGGACACTAATGTGAAAAGG   | NM_001319727.1   |
| ZmPYL7      | CCGAACCACACAGTAACAATAGATG | AGGAGAGGTGGAGATTGGGTTAG | EU964115.1       |
| ZmPYL8      | TCCAGAACTACTCATCCATCATAAC | ATGTCTCGTCCTTCGTGTTG    | BT055711.1       |
| ZmPYL9      | GAAAGAGGAGCAGACAAACAAAATC | GACGGATGAGGACGAGGAAA    | NM_001147497.1   |
| ZmPYL10     | GGCAACACCAAGGACGAGA       | CAGTAGCAGTAGCAGTCCCTCAA | EU959289.1       |
| ZmPYL11     | ACCTCGTCGTCTGCTTTTCC      | TCCATCTCCACCACCATCAC    | EU967268.1       |
| ZmPP2CA     | GATGCTGGCTCAACTGCCT       | GAAACCGCAATACCCTGTCC    | NM_001155565.2   |
| ZmPP2C ABI1 | CACATCGTGGTCGCCAACT       | CCACCTGCTGATTCTACCCTTT  | NM_001158117.1   |
| ZmPP2C ABI2 | AGCACTGGGAGAAGGTCTTTGT    | GGCAACGATGACATGCGAT     | NM_001156830.1   |
| ZmSnRK2.2   | CGAAGAATTTCCGCAAGACG      | TCGCCACAAAGATCCGAGAC    | NM_001137717.2   |
| ZmSnRK2.3   | CGCCTTCTGTCTCAGATATTCG    | GCATCCGCGTCCTTGTAGTT    | NM_001143024.1   |
| ZmSnRK2.6   | ACATCGGTTCCGGCAACTT       | TCCCTCGCCACATTCTCGT     | NM_001143324.1   |
